# Supplementary material for: Effect of atrial fibrillation on endovascular thrombectomy for acute ischemic stroke. A meta-analysis of individual patient data from six randomised trials: Results from the HERMES collaboration
Source: PubMed Central journal article supplement — Eur Stroke J. 2020 May 13;5(3):245–51. doi: 10.1177/2396987320923447 (PMC7538768; doi:10.1177/2396987320923447), 2020-05-13

## Supplemental material

Table S1: Baseline characteristics by AF status

| Characteristic                                     | AF<br>(n = 447)        | No AF<br>(n = 904)    | p-value |
|----------------------------------------------------|------------------------|-----------------------|---------|
| Age (years)<br>(mean ± SD)                         | 72.8 ± 9.8<br>(447)    | 63.3 ± 13.6<br>(902)  | <0.001  |
| Female gender                                      | 49%                    | 47% (903)             | 0.524   |
| Diabetes mellitus                                  | 20%                    | 16%                   | 0.170   |
| Hypertension                                       | 72%                    | 50%                   | <0.001  |
| NIHSS at baseline<br>(mean at baseline)            | 17.1 ± 5.1<br>(446)    | 16.7 ± 5.4<br>(897)   | 0.125   |
| tPA delivered                                      | 76%<br>(341/447)       | 91%<br>(819/904)      | <0.001  |
| Onset to tPA (min)<br>(mean ± SD (N))              | 120.6 ± 59.6<br>(340)  | 113.9 ± 54.8<br>(819) | 0.065   |
| ASPECTS at baseline<br>(mean ± SD (N))             | 8.0 ± 1.7<br>(441)     | 7.7 ± 1.8<br>(891)    | <0.001  |
| Occlusion location                                 |                        |                       | 0.619   |
| Not available                                      | 7%                     | 5%                    |         |
| ICA                                                | 26%                    | 29%                   |         |
| M1                                                 | 58%                    | 57%                   |         |
| M2                                                 | 9%                     | 9%                    |         |
| Other                                              | 0%                     | 0%                    |         |
| Onset to randomization<br>(min)<br>(mean ± SD (N)) | 213.1 ± 100.5<br>(447) | 209.4 ± 94.0<br>(899) | 0.508   |

Table S2: Primary and secondary outcomes by AF status and treatment allocation.

|                                              |      | AF               |                  | No AF            |                  |
|----------------------------------------------|------|------------------|------------------|------------------|------------------|
| Outcome                                      | N    | Control          | EVT              | Control          | EVT              |
| Modified Rankin score at 90 days             | 1341 |                  |                  |                  |                  |
| 0                                            |      | 5.9% (13/220)    | 11.6% (26/224)   | 4.4% (20/455)    | 9.5% (42/442)    |
| 1                                            |      | 10.0% (22/220)   | 15.6% (35/224)   | 7.5% (34/455)    | 18.3% (81/442)   |
| 2                                            |      | 11.4% (25/220)   | 15.2% (34/224)   | 15.2% (69/455)   | 20.4% (90/442)   |
| 3                                            |      | 10.0% (22/220)   | 17.4% (39/224)   | 20.0% (91/455)   | 16.3% (72/442)   |
| 4                                            |      | 23.2% (51/220)   | 12.5% (28/224)   | 24.6% (112/455)  | 17.0% (75/442)   |
| 5                                            |      | 14.5% (32/220)   | 7.1% (16/224)    | 12.7% (58/455)   | 5.4% (24/442)    |
| 6                                            |      | 25.0% (55/220)   | 20.5% (46/224)   | 15.6% (71/455)   | 13.1% (58/442)   |
| Functional independence (mRS 0-2) at 90 days | 1341 | 27.3% (60/220)   | 42.4% (95/224)   | 27.0% (123/455)  | 48.2% (213/442)  |
| NIHSS score at 24 hours                      | 1309 | 13.9 ± 7.8 (218) | 10.7 ± 8.6 (219) | 14.1 ± 7.9 (443) | 10.4 ± 8.7 (429) |
| Symptomatic intracranial hemorrhage          | 1351 | 3.1% (7/223)     | 3.6% (8/224)     | 4.6% (21/461)    | 4.5% (20/443)    |
| Mortality at 90 days                         | 1341 | 25.0% (55/220)   | 20.5% (46/224)   | 15.6% (71/455)   | 13.1% (58/442)   |

**Figure S1: Flow diagram of included patients**

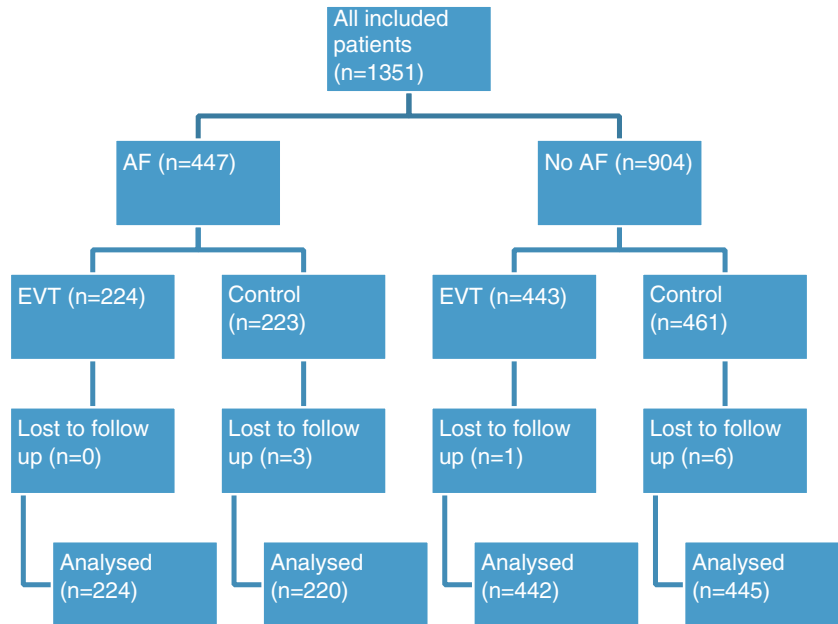

Supplement: sj-pdf-1-eso-10.1177_2396987320923447.pdf [file sj-pdf-1-eso-10.1177_2396987320923447.pdf]
